# Supplementary material
Source: Royal Society of Chemistry journal article supplement (doi:10.1039/d5cp03913d)
Supplement: d5cp03913d1.pdf [file d5cp03913d1.pdf]

## Supporting Information

### Effect of shell structure on photocatalytic activity of UCNPs/NMC: comparison of inert and active shells

Xin Wang<sup>a\*</sup>, Hehe Ren<sup>c</sup>, Jiahui Cui<sup>a</sup>, Jiayi Shi<sup>a</sup>, Wenbo Zou<sup>a</sup>

<sup>a</sup>*School of Chemistry and Chemical Engineering, Zhoukou Normal University, Zhoukou 466000,  
PR China*

<sup>b</sup>*School of Mathematics and Statistics, Zhoukou Normal University, Henan Province 466001,  
China*

<sup>c</sup>*College of Chemistry and Molecular Sciences, Henan University, Kaifeng, Henan 475004,  
PRChina*

#### 1. Materials

$\text{Y}(\text{CH}_3\text{COOH})_3 \cdot 4\text{H}_2\text{O}$ ,  $\text{Yb}(\text{CH}_3\text{COOH})_3 \cdot 4\text{H}_2\text{O}$ ,  $\text{Tm}(\text{CH}_3\text{COOH})_3 \cdot 4\text{H}_2\text{O}$ ,  
 $\text{Ce}(\text{CH}_3\text{COOH})_3 \cdot 4\text{H}_2\text{O}$ ,  $\text{Ho}(\text{CH}_3\text{COOH})_3 \cdot 4\text{H}_2\text{O}$ , Oleic acid (OA), Octadecene (ODE)  
and polyvinylpyrrolidone (PVP,  $M_w = 40,000$ ) were purchased from Sigma-Aldrich.  
NaOH,  $\text{NH}_4\text{F}$ , 2-aminoterephthalic acid ( $\text{NH}_2\text{-BDC}$ ) and Chromium nitrate  
nonahydrate were purchased from Greagent. Rhodamine B (RhB), 1,4-benzoquinone  
(BQ) and ethylenediaminetetraacetate (EDTA) were also purchased from Adamas. All  
the chemical reagents were used without further purification.

#### 2. Synthesis of **Tm@Yb** nanoparticles

The 1 mmol of  $\text{RE}(\text{CH}_3\text{COO})_3$  ( $\text{RE}=78\%\text{Y}+20\%\text{Yb}$ ) were dissolved in 6 mL OA  
and 15 mL ODE in a three-necked round-bottom flask. The core-shell **Tm@Yb**

---

\*Corresponding authors  
E-mail addresses: wangxinjiangnan@163.com (X. Wang).

nanoparticles were dispersed in 10 mL of cyclohexane for the next step. Then, the next steps are the same as the synthetic method of the **Tm@Y** except that the 300 °C was kept for 100 mins under Ar flow atmosphere. The core-shell **Tm@Yb** nanoparticles were dispersed in 10 mL of cyclohexane for the next step.

### *3. Synthesis of **Tm@Ce** nanoparticles*

The 1 mmol of RE(CH<sub>3</sub>COO)<sub>3</sub> (RE=50%Y+20%Yb+30%Ce) were dissolved in 6 mL OA and 15 mL ODE in a three-necked round-bottom flask. Then, the next steps are the same as the synthetic method of the **Tm@Y** except that the 300 °C was kept for 90 mins under Ar flow atmosphere. The core-shell **Tm@Ce** nanoparticles were dispersed in 10 mL of cyclohexane for the next step.

### *4. Synthesis of **Tm@Ho** nanoparticles*

The 1 mmol of RE(CH<sub>3</sub>COO)<sub>3</sub> (RE=50%Y+20%Yb+30%Ho) were dissolved in 6 mL OA and 15 mL ODE in a three-necked round-bottom flask. Then, the next steps are the same as the synthetic method of the **Tm@Ho** except that the 300 °C was kept for 120 mins under Ar flow atmosphere. The core-shell **Tm@Ho** nanoparticles were dispersed in 10 mL of cyclohexane for the next step.

### *5. Surface modification of **Tm@Y***

The 10 mL solution including 1 mmol **Tm@Y** was dispersed in 20 mL PVP solution (12.5 mg mL<sup>-1</sup>). The mixture was magnetically stirred at room temperature for 24 h. Then, the product was separated by centrifugation and washed with ethanol by 3 times. The products were dispersed in ethanol solution for the next step.

### *6. Stability tests.*

After every 60 minutes of photocatalytic operation under simulated solar

radiation, the photocatalyst was collected by centrifugation, washed three times with deionized water and ethanol, and dried at 60 °C. The regenerated photocatalyst is then reused for the next cycle under the same reaction conditions. The concentration of the solution was measured by ultraviolet visible spectrophotometer.

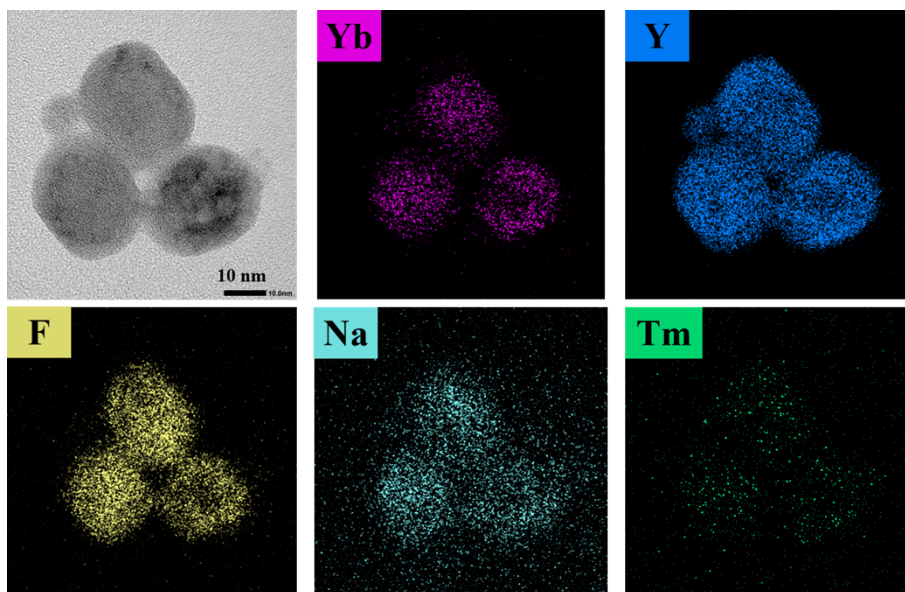

**Fig. S1.** Elemental mapping images of Tm@Y/NMC.

**Fig. S2.** XPS spectrum of **Tm@Ho/NMC**: (a) full-scan spectrum, (b) Na 1s, (c) F 1s, (d) Y 3d, (e) Ho 4d, (f) Yb 4d, and (g) Cr 2p.

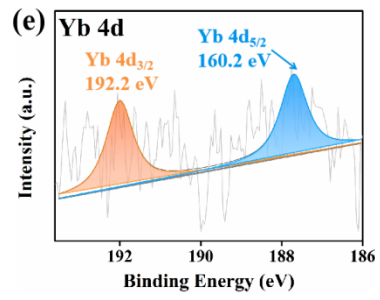

**Fig. S3.** XPS spectrum of **Tm@Yb/NMC**: (a) full-scan spectrum, (b) Na 1s, (c) F 1s, (d) Y 3d, (e) Yb4d, and (f) Cr 2p.

**Fig. S4.** XPS spectrum of **Tm@Ce/NMC**: (a) full-scan spectrum, (b) Na 1s, (c) F 1s, (d) Y 3d, (e) Ce 3d, (f) Yb 4d, and (g) Cr 2p.

**Fig. S5.** The UV-Vis-NIR diffuserefectance spectra of **Tm@Y/NMC**.

**Fig. S6.** The dark adsorption time curve of **Tm@Y/NMC**.

**Fig. S7.** Photodegradation of RhB solution by different photocatalysts under simulated solar light irradiation.

**Fig. S8.** Photocatalytic degradation of BPA over **Tm@Y/NMC** and **Tm@Yb/NMC** under simulated solar light irradiation.

**Fig. S9.** XRD patterns of **Tm@Y/NMC** photocatalyst before and after photocatalytic reaction.

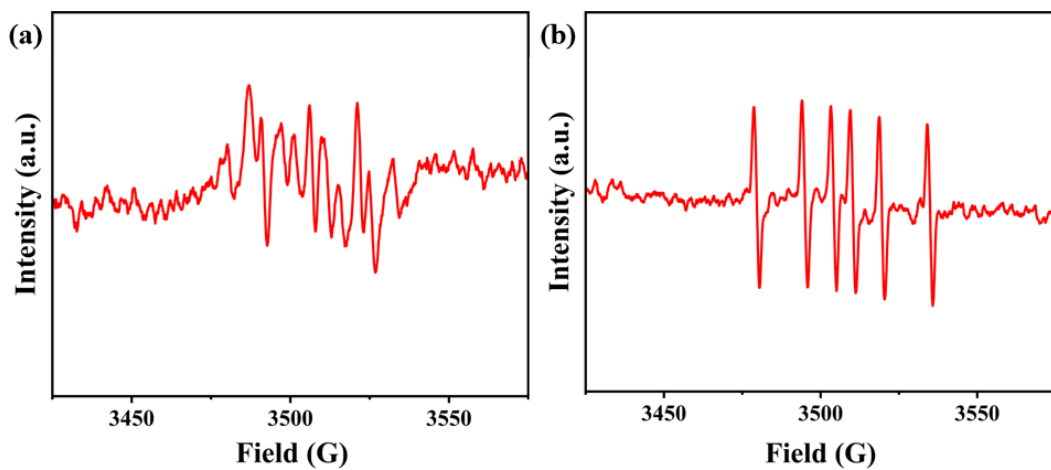

**Fig. S10.** EPR spectra for (a)  $\text{DMPO}\cdot\text{OH}$  and (b)  $\text{DMPO}\cdot\text{O}_2\cdot$  radicals of  $\text{Tm@Y/NMC}$  under light irradiation.

**Fig. S11.** Zeta potentials of **Tm@Yb/NMC**, **Tm@Ce/NMC**, **Tm@Ho/NMC**, and **Tm@Y/NMC**

| Sample           | k/ (min <sup>-1</sup> ) |
|------------------|-------------------------|
| RhB              | 0.000                   |
| <b>Tm/NMC</b>    | 0.017                   |
| <b>Tm@Yb/NMC</b> | 0.020                   |
| <b>Tm@Y/NMC</b>  | 0.029                   |
| <b>Tm@Ho/NMC</b> | 0.023                   |
| <b>Tm@Ce/NMC</b> | 0.026                   |

**Table. S1.** Kinetic fitting results of RhB concentration evolution with irradiation time in the presence of different photocatalysts under simulated solar light irradiation.
